*Hugh C. Hemmings, Jr., M.D., Ph.D., Editor*  
*Alan Jay Schwartz, M.D., M.S. Ed., Associate Editor*

## The Value of Ultrasound in the Safe Care of a Patient with Neurofibromatosis

Aditee Parag Ambardekar, M.D.,\* Arjunan Ganesh, M.B.B.S., Alan Jay Schwartz, M.D., M.S.Ed.

\* Department of Anesthesiology and Critical Care Medicine, Children's Hospital of Philadelphia, University of Pennsylvania Perelman School of Medicine, Philadelphia, Pennsylvania.  
 ambardekara@email.chop.edu

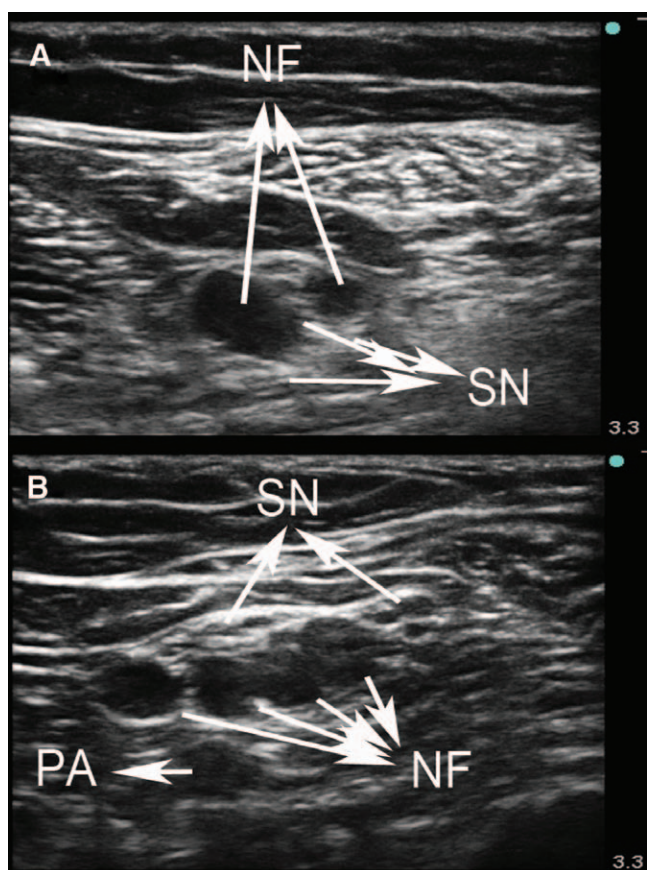

**W**E describe the utility of ultrasound in facilitating the safe care of a 13-yr-old patient with pseudoarthrosis of her distal tibia secondary to neurofibromatosis. Tibial osteotomy and application of an internal rod and external fixator were planned. Continuous sciatic nerve (SN) blockade using a perineural catheter was planned to supplement general anesthesia and provide postoperative analgesia. The patient was positioned for posterior approach to the SN using ultrasound guidance after induction of general anesthesia and endotracheal intubation.

Ultrasonographic images obtained of the SN from the subgluteal region (fig. A) to the popliteal fossa (fig. B) demonstrated multiple solid, hypoechoic structures consistent with neurofibromas (NF) as the SN divided into the tibial and common peroneal nerves.<sup>1</sup> The popliteal artery (PA) was confirmed by Doppler.

Ultrasound-guided SN block has been described in the presence of NF by targeting tumor-free portions of the nerve.<sup>2,3</sup> We, however, were unable to visualize portions of the SN free of NF. There is no evidence to support the presence of NF as contraindication to nerve block techniques, but perineural injection of local anesthetic in the presence of NF has theoretical risks. Ineffective spread of anesthetic and failed block, hemorrhage into the NF causing or worsening nerve compression, or spreading neurofibromatous cells through the needle's track are concerns. A decision was made to abort the block and administer intravenous narcotics for postoperative analgesia.

### References

1. Beggs I: Sonographic appearance of nerve tumors. *J Clin Ultrasound* 1999; 27:363-8
2. Desai A, Carvalho B, Hansen J, Hill J: Ultrasound-guided popliteal nerve block in a patient with malignant degeneration of neurofibromatosis 1. *Case Rep Anesthesiol* 2012; 2012:753769
3. Rocco ML, Rosenblatt MA: Ultrasound-guided peripheral nerve block in a patient with neurofibromatosis. *Reg Anesth Pain Med* 2011; 36:88-9
